# Supplementary material for: mRNA sequencing reveals the distinct gene expression and biological functions in cardiac fibroblasts regulated by recombinant fibroblast growth factor 2
Source: PeerJ journal article supplement (doi:10.7717/peerj.15736), 2023-07-19

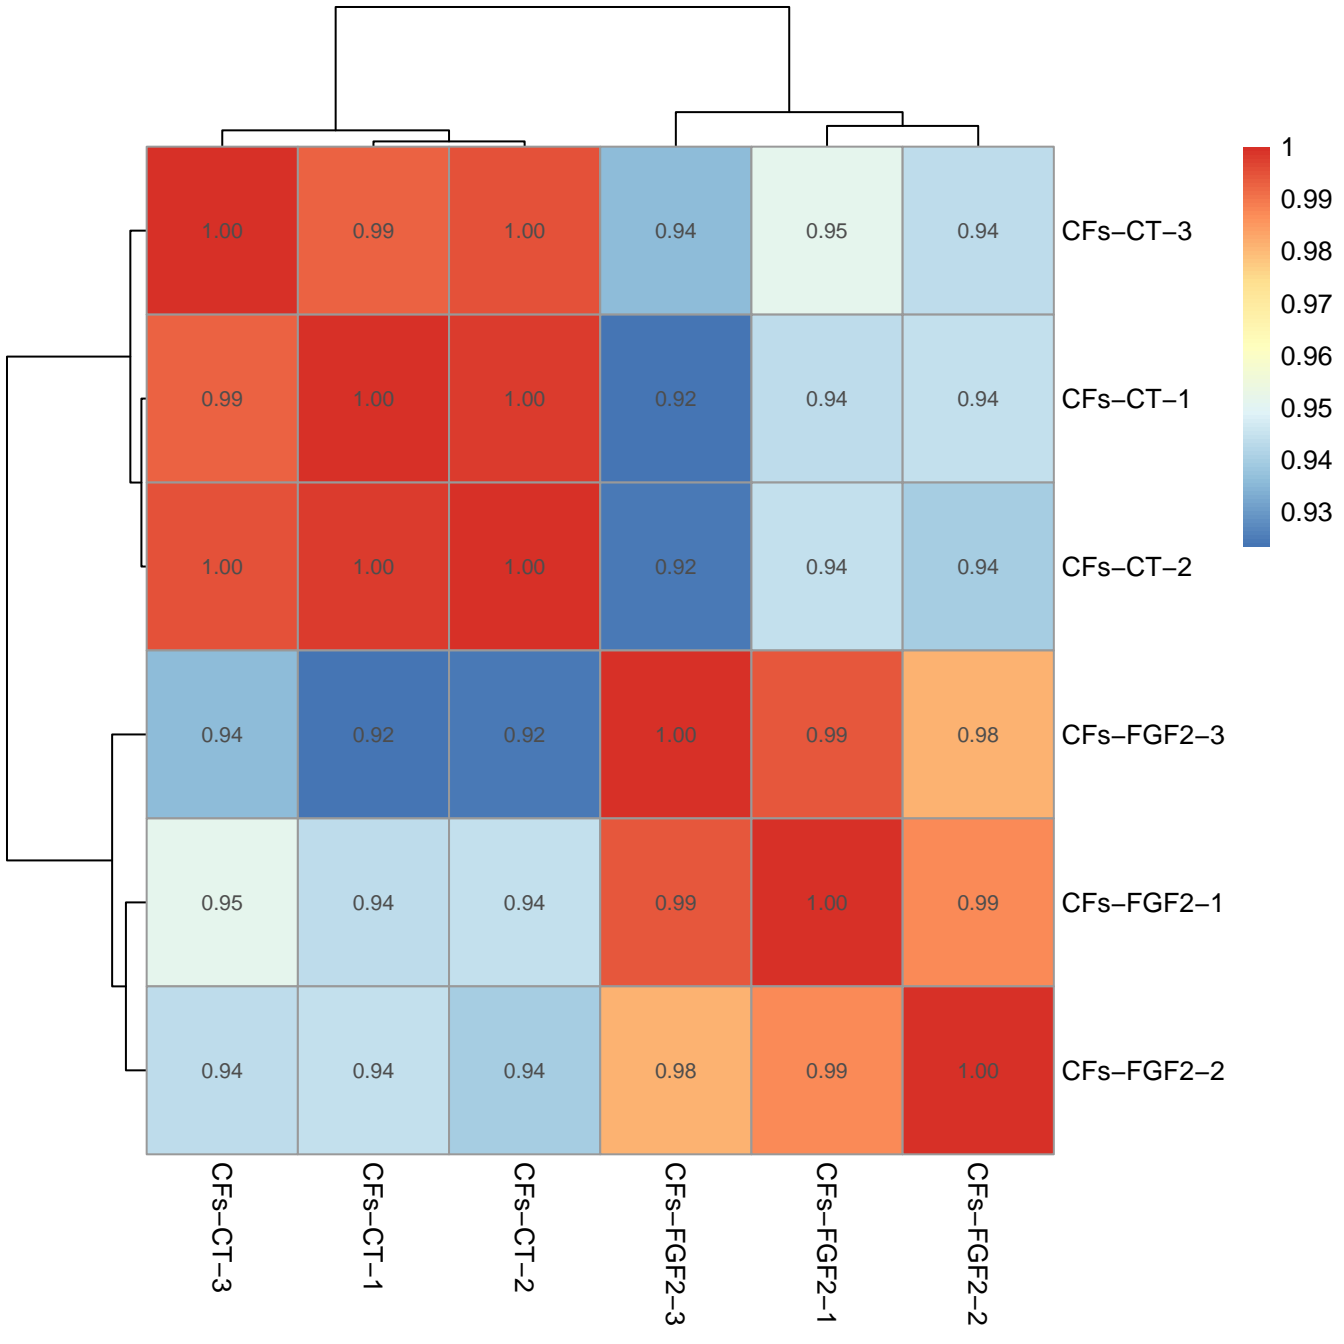

Supplement: Figure_S1.pdf [file Figure_S1.pdf]
