# Supplementary material for: mRNA sequencing reveals the distinct gene expression and biological functions in cardiac fibroblasts regulated by recombinant fibroblast growth factor 2
Source: PeerJ journal article supplement (doi:10.7717/peerj.15736), 2023-07-19
Supplement: Table_S1.pdf [file Table_S1.pdf]

**Table S1.** Primers for RT-PCR in this study.

| Primer  | Oligonucleotide Sequences (5'-3') |
|---------|-----------------------------------|
| Col3a1F | GGCCTCCCAGAACATTACATACC           |
| Col3a1R | CATGGCCTTGCGTGTTTG                |
| ElnF    | AAACTGCCCTATGGAGTGGC              |
| ElnR    | TCCAGCACCATACTTCGCTG              |
| ItgblF  | TTGATCCAACCTGGCGACTGG             |
| ItgblR  | TGGGTGCTCACACTTCTTCC              |
| Acta2F  | CATCACCAACTGGGACGACA              |
| Acta2R  | TCCGTTAGCAAGGTCGGATG              |
| Thbs2F  | CCACCAGAACAACCAAGACAAC            |
| Thbs2R  | ATCATCGGAGTCACAGGCATC             |
| GAPDHf  | ACACCCACTCCTCCACCTTT              |
| GAPDHR  | TTACTCCTTGGAGGCCATGT              |
| Ccdc80F | GGATGACGAGGACTTGGTAGAC            |
| Ccdc80R | AACACGGACTTCATTGCTATTGG           |
| TaglnF  | TGGCTGAAGAATGGCGTGAT              |
| TaglnR  | TCCATCGTTCTTGGTCACGG              |
| Gas6F   | TAGAAGTCGTGGCTCGCATT              |
| Gas6R   | GTACCATCCACTTCCAGGGTG             |
