# Supplementary material for: mRNA sequencing reveals the distinct gene expression and biological functions in cardiac fibroblasts regulated by recombinant fibroblast growth factor 2
Source: PeerJ journal article supplement (doi:10.7717/peerj.15736), 2023-07-19
Supplement: Table_S2.pdf [file Table_S2.pdf]

**Table S2.** Differentially expressed genes.

| gene_id            | baseMean   | log2(FoldChange) | GeneSymbol |
|--------------------|------------|------------------|------------|
| ENSRNOG00000016388 | 242.706389 | -5.2978738       | Sphkap     |
| ENSRNOG00000012031 | 127.019435 | -3.606805        | St8sia2    |
| ENSRNOG00000029911 | 129.487806 | -3.0878943       | Cilp       |
| ENSRNOG00000016818 | 1087.01095 | -2.8875318       | Fgfr3      |
| ENSRNOG00000003587 | 1326.32653 | -2.7352065       | Vegfd      |
| ENSRNOG00000017672 | 115.291994 | -2.5754164       | Akr1c14    |
| ENSRNOG00000058609 | 202.829209 | -2.5581519       | Palmd      |
| ENSRNOG00000005998 | 390.554909 | -2.5324125       | Smoc1      |
| ENSRNOG00000023148 | 1966.54057 | -2.4010893       | Col11a1    |
| ENSRNOG00000004197 | 163.96304  | -2.382929        | Asb12      |
| ENSRNOG00000018346 | 1049.32297 | -2.3667479       | Agtr1a     |
| ENSRNOG00000014886 | 777.527698 | -2.366262        | Fam107b    |
| ENSRNOG00000025624 | 189.733912 | -2.3436623       | Arhgap20   |
| ENSRNOG00000014686 | 807.878056 | -2.2963836       | Kcnd3      |
| ENSRNOG00000013166 | 795.080144 | -2.1325899       | Wnt4       |
| ENSRNOG00000008336 | 7984.7563  | -2.1181502       | Tnfrsf11b  |
| ENSRNOG00000011946 | 1875.23299 | -2.1106572       | Ptn        |
| ENSRNOG00000001627 | 493.316105 | -2.0869472       | Abi3bp     |
| ENSRNOG00000006670 | 151.654277 | -2.0682362       | Rai2       |
| ENSRNOG00000004516 | 238.054299 | -2.061043        | Itgb11     |
| ENSRNOG00000007443 | 2794.76645 | -2.0601423       | Jag1       |
| ENSRNOG00000010079 | 221.929337 | -2.0498441       | Car3       |
| ENSRNOG00000001469 | 15449.9402 | -2.0022692       | Eln        |
| ENSRNOG00000030210 | 1122.69929 | -1.9732143       | Fndc1      |
| ENSRNOG00000024602 | 529.802736 | -1.9716946       | Plekha7    |
| ENSRNOG00000005094 | 602.168329 | -1.9474594       | C1qtnf7    |
| ENSRNOG00000025184 | 461.856878 | -1.9251484       | Prss35     |
| ENSRNOG00000007540 | 337.265456 | -1.9223106       | Msc        |
| ENSRNOG00000012442 | 13226.3363 | -1.9112155       | Cemip      |
| ENSRNOG00000014143 | 113.783231 | -1.900848        | Col24a1    |
| ENSRNOG00000019184 | 190.79089  | -1.8800029       | Npr3       |
| ENSRNOG00000032659 | 134.008336 | -1.8623229       | Plcl1      |
| ENSRNOG00000000875 | 3234.75311 | -1.7837885       | Fhl1       |
| ENSRNOG00000014549 | 218.40339  | -1.7707121       | Arhgef26   |
| ENSRNOG00000028624 | 253.297309 | -1.759217        | Kif26b     |
| ENSRNOG00000029148 | 427.629457 | -1.7391265       | Pdgfd      |
| ENSRNOG00000001227 | 1602.25125 | -1.6960397       | Adarb1     |
| ENSRNOG00000013072 | 162.171777 | -1.6917659       | Plxna4     |
| ENSRNOG00000046366 | 704.028839 | -1.6688362       | Dmd        |
| ENSRNOG00000020585 | 203.242508 | -1.6562802       | Tbxa2r     |

---

|                     |            |            |          |
|---------------------|------------|------------|----------|
| ENSRNOG00000003183  | 921.811105 | -1.6405088 | Fmod     |
| ENSRNOG000000039902 | 1527.40241 | -1.6097362 | Lbh      |
| ENSRNOG00000001645  | 3416.40286 | -1.5907594 | Filip11  |
| ENSRNOG000000013641 | 154.439706 | -1.5823537 | Myo7a    |
| ENSRNOG000000016219 | 434.405484 | -1.5816756 | Vnn1     |
| ENSRNOG000000011416 | 1378.61879 | -1.5736316 | Vegfc    |
| ENSRNOG000000012302 | 730.350892 | -1.5567906 | Gucyl1a3 |
| ENSRNOG00000002053  | 262.034418 | -1.5563333 | Fras1    |
| ENSRNOG000000010666 | 4118.72815 | -1.5328384 | Wisp2    |
| ENSRNOG000000043199 | 121.781185 | -1.5250781 | Bves     |
| ENSRNOG000000054212 | 280.103743 | -1.52095   | Pde1a    |
| ENSRNOG000000015157 | 127.846087 | -1.5208939 | Smtnl2   |
| ENSRNOG000000010350 | 147.226551 | -1.513447  | Rcan2    |
| ENSRNOG000000017164 | 1759.0546  | -1.503576  | Afap112  |
| ENSRNOG000000010392 | 268.437798 | -1.5015371 | Nrg1     |
| ENSRNOG000000003134 | 307.645182 | -1.5009553 | Slc4a4   |
| ENSRNOG000000016213 | 1028.42204 | -1.4975917 | Ssbp2    |
| ENSRNOG000000033528 | 413.211238 | -1.4903918 | Tll1     |
| ENSRNOG000000002773 | 679.478892 | -1.4670813 | Rgs4     |
| ENSRNOG000000008666 | 338.126311 | -1.4610107 | Etl4     |
| ENSRNOG000000061910 | 5012.92908 | -1.4598249 | Igfbp3   |
| ENSRNOG000000015318 | 932.034636 | -1.4448316 | Hey1     |
| ENSRNOG000000048478 | 417.757192 | -1.4443061 | Kcne4    |
| ENSRNOG000000002052 | 44127.6069 | -1.4389776 | Ccdc80   |
| ENSRNOG000000013364 | 168.582888 | -1.4170435 | Hey2     |
| ENSRNOG000000029394 | 129.995053 | -1.4119187 | Dusp8    |
| ENSRNOG000000006931 | 252.399807 | -1.3977336 | Eepd1    |
| ENSRNOG000000033697 | 780.402728 | -1.3948614 | Casp4    |
| ENSRNOG000000002413 | 5545.24717 | -1.3844754 | Gpc4     |
| ENSRNOG000000005711 | 826.503458 | -1.3831589 | Ptprd    |
| ENSRNOG000000013011 | 1000.27393 | -1.3764733 | Dnajb4   |
| ENSRNOG000000018551 | 380.988603 | -1.3752292 | Olr63    |
| ENSRNOG000000002097 | 2769.34168 | -1.3739097 | Rasl11b  |
| ENSRNOG000000030715 | 179.533507 | -1.3678917 | Cfh      |
| ENSRNOG000000014548 | 1070.88831 | -1.3609564 | Nedd9    |
| ENSRNOG000000027491 | 2720.69862 | -1.3584024 | Vldlr    |
| ENSRNOG000000052444 | 439.647799 | -1.3506304 | Samd9    |
| ENSRNOG000000002208 | 193.908573 | -1.3502885 | Shroom3  |
| ENSRNOG000000009867 | 12932.5845 | -1.3442072 | Tgfb3    |
| ENSRNOG000000057880 | 3479.88108 | -1.3324142 | Myh11    |
| ENSRNOG000000015075 | 159.551461 | -1.3314949 | Stc1     |
| ENSRNOG000000016012 | 1442.85393 | -1.3266026 | Spats21  |
| ENSRNOG000000001823 | 326.748809 | -1.3226263 | St6gal1  |

---

|                    |            |            |                    |       |
|--------------------|------------|------------|--------------------|-------|
| ENSRNOG00000001963 | 1487.22015 | -1.3219254 | Mx2                |       |
| ENSRNOG00000012563 | 2805.72556 | -1.3204771 | Arhgap29           |       |
| ENSRNOG00000046660 | 1233.20413 | -1.3194159 | Gpc6               |       |
| ENSRNOG00000016516 | 114.108392 | -1.3125761 | Mbp                |       |
| ENSRNOG00000012367 | 304.539701 | -1.3042992 | Pcdh7              |       |
| ENSRNOG00000033434 | 446.799408 | -1.3029352 | Casp12             |       |
| ENSRNOG00000004345 | 1178.60627 | -1.2996811 | Daam1              |       |
| ENSRNOG00000020783 | 101.433118 | -1.2883335 | Ntf4               |       |
| ENSRNOG00000003745 | 249.887334 | -1.2852952 | Atf3               |       |
| ENSRNOG00000000413 | 204.984395 | -1.2843643 | Pln                |       |
| ENSRNOG00000007964 | 266.616465 | -1.2818889 | Tp53inp1           |       |
| ENSRNOG00000004210 | 296.735672 | -1.2741423 | Osr1               |       |
| ENSRNOG00000012512 | 548.831752 | -1.2708822 | Nexn               |       |
| ENSRNOG00000007090 | 476.242453 | -1.2673379 | Cacna1c            |       |
| ENSRNOG00000019822 | 940.209444 | -1.2577461 | Gadd45b            |       |
| ENSRNOG00000019050 | 154.93174  | -1.256644  | Ifit1              |       |
| ENSRNOG00000002418 | 3573.0008  | -1.2498727 | Tgfb2              |       |
| ENSRNOG00000006545 | 1544.46611 | -1.2381424 |                    | 44081 |
| ENSRNOG00000048315 | 916.237487 | -1.2281879 | Eif2ak2            |       |
| ENSRNOG00000018865 | 2229.83561 | -1.2240093 | Adamts12           |       |
| ENSRNOG00000033527 | 124.185276 | -1.2225543 | Pappal             |       |
| ENSRNOG00000016538 | 2914.16318 | -1.2223593 | Itga8              |       |
| ENSRNOG00000004624 | 1877.10513 | -1.2220259 | Rnd3               |       |
| ENSRNOG00000004517 | 344.944204 | -1.2180529 | Igf1               |       |
| ENSRNOG00000015353 | 124.020527 | -1.2103268 | Prss12             |       |
| ENSRNOG00000008622 | 132.97264  | -1.2085908 | Creb5              |       |
| ENSRNOG00000056562 | 448.545502 | -1.2052951 | Olfml1             |       |
| ENSRNOG00000005650 | 433.89988  | -1.2049899 | Pgf                |       |
| ENSRNOG00000013160 | 2297.39684 | -1.20304   | Sash1              |       |
| ENSRNOG00000026607 | 1449.69893 | -1.2030239 | Tnfsf18            |       |
| ENSRNOG00000004882 | 114.904537 | -1.1963269 | Capn6              |       |
| ENSRNOG00000058289 | 126.199276 | -1.1953378 | AABR07027575.<br>1 |       |
| ENSRNOG00000024372 | 109.818282 | -1.1881727 | Cwf1912            |       |
| ENSRNOG00000008116 | 766.071491 | -1.1857103 | Plpp3              |       |
| ENSRNOG00000006723 | 2200.19694 | -1.1794722 | Itga11             |       |
| ENSRNOG00000018804 | 128.125404 | -1.1773496 | Ripor2             |       |
| ENSRNOG00000055049 | 683.931257 | -1.1766813 | Aldh1a2            |       |
| ENSRNOG00000005670 | 140.447866 | -1.1743924 | Art4               |       |
| ENSRNOG00000025895 | 2560.3365  | -1.1689631 | Cavin2             |       |
| ENSRNOG00000007202 | 313.063761 | -1.1666517 | Sema3d             |       |
| ENSRNOG00000021243 | 114.040007 | -1.1662597 | Siglec1            |       |
| ENSRNOG00000015658 | 1026.99027 | -1.153369  | Sorbs1             |       |

|                    |            |            |                    |
|--------------------|------------|------------|--------------------|
| ENSRNOG00000024870 | 134.394344 | -1.1466651 | Anks1b             |
| ENSRNOG00000003018 | 3394.24845 | -1.143367  | Olfml2b            |
| ENSRNOG00000001642 | 1285.26024 | -1.1405599 | Tbc1d23            |
| ENSRNOG00000012658 | 873.040891 | -1.1334383 | Pdlim3             |
| ENSRNOG00000033581 | 623.838939 | -1.1325762 | AABR07044388.<br>2 |
| ENSRNOG00000020467 | 868.988648 | -1.1299703 | Nrep               |
| ENSRNOG00000011871 | 105.813584 | -1.1191056 | AABR07066180.<br>1 |
| ENSRNOG00000012095 | 124.906934 | -1.1127831 | Pkia               |
| ENSRNOG00000019577 | 100.611003 | -1.1125766 | Adamts19           |
| ENSRNOG00000004578 | 1447.88237 | -1.1108404 | Cthrc1             |
| ENSRNOG00000011521 | 114.502312 | -1.1095727 | Filip1             |
| ENSRNOG00000001302 | 172.448146 | -1.1029023 | Adora2a            |
| ENSRNOG00000004512 | 304.585083 | -1.1026802 | Apool              |
| ENSRNOG00000013179 | 2824.73064 | -1.1020987 | Tinagl1            |
| ENSRNOG00000008697 | 6877.6321  | -1.1015191 | Nov                |
| ENSRNOG00000012036 | 241.794391 | -1.0988847 | Pesk5              |
| ENSRNOG00000057713 | 556.552328 | -1.0947095 | Cav2               |
| ENSRNOG00000015736 | 488.449477 | -1.0946444 | Dhrs3              |
| ENSRNOG00000036816 | 5420.30077 | -1.0943337 | Wls                |
| ENSRNOG00000022356 | 365.139823 | -1.0928821 | Zc2hc1a            |
| ENSRNOG00000026293 | 1396.09837 | -1.0886758 | Jun                |
| ENSRNOG00000000572 | 258.050414 | -1.0876486 | Chst3              |
| ENSRNOG00000006410 | 126.628443 | -1.0832242 | Akap5              |
| ENSRNOG00000009715 | 2288.97231 | -1.0784967 | Me1                |
| ENSRNOG00000006833 | 796.361098 | -1.0750697 | Rb1cc1             |
| ENSRNOG00000023261 | 344.297675 | -1.0722594 | Ube2q2l            |
| ENSRNOG00000031092 | 1276.44928 | -1.0709594 | Rock1              |
| ENSRNOG00000018859 | 305.823698 | -1.0646881 | Pik3ip1            |
| ENSRNOG00000013002 | 708.301094 | -1.0609549 | Gbppl              |
| ENSRNOG00000016378 | 155.601905 | -1.0596197 | Map3k8             |
| ENSRNOG00000014837 | 1269.88062 | -1.0582314 | Emilin2            |
| ENSRNOG00000021084 | 262.809467 | -1.0560969 | AABR07006310.<br>1 |
| ENSRNOG00000050215 | 264.004552 | -1.0460383 | AABR07044375.<br>1 |
| ENSRNOG00000058973 | 401.591025 | -1.0423239 | Atad2b             |
| ENSRNOG00000010921 | 388.961482 | -1.0418971 | Taf1d              |
| ENSRNOG00000049873 | 118.581897 | -1.0406122 | Ap1s3              |
| ENSRNOG00000027520 | 6495.18103 | -1.0373131 | Pls3               |
| ENSRNOG00000018382 | 173.386515 | -1.0356152 | Inpp4b             |
| ENSRNOG00000013017 | 652.746593 | -1.0256441 | Arnt2              |
| ENSRNOG00000031814 | 1266.80653 | -1.0247192 | Sort1              |
| ENSRNOG00000051440 | 531.531045 | -1.0242338 | Ppp1r12b           |

---

|                    |            |            |                    |
|--------------------|------------|------------|--------------------|
| ENSRNOG00000004540 | 248.277183 | -1.0211206 | Clec3b             |
| ENSRNOG00000060100 | 137.422981 | -1.0205676 | Kn1l               |
| ENSRNOG00000051548 | 1306.65174 | -1.0184655 | Lmod1              |
| ENSRNOG00000022839 | 134.934983 | -1.0143955 | Ifit3              |
| ENSRNOG00000056246 | 1819.19273 | -1.013948  | Gls                |
| ENSRNOG00000004160 | 404.550935 | -1.013314  | Prps2              |
| ENSRNOG00000013090 | 1474.24294 | -1.012398  | Gadd45g            |
| ENSRNOG00000055564 | 266.988728 | -1.0045132 | RGD1564664         |
| ENSRNOG00000013391 | 877.226839 | -0.9984877 | Sorbs2             |
| ENSRNOG00000013963 | 6663.05255 | -0.9968847 | Il6st              |
| ENSRNOG00000054488 | 104.055641 | -0.9950732 | LOC500584          |
| ENSRNOG00000009949 | 1709.50788 | -0.9950608 | Pcdh18             |
| ENSRNOG00000000563 | 1058.39713 | -0.9948149 | Adamts14           |
| ENSRNOG00000008079 | 1218.68301 | -0.9937287 | Ugp2               |
| ENSRNOG00000024345 | 178.847403 | -0.9921251 | Pard3b             |
| ENSRNOG00000004281 | 304.410134 | -0.9901088 | Cobl               |
| ENSRNOG00000026044 | 148.790561 | -0.9895122 | Prrg1              |
| ENSRNOG00000006726 | 139.145971 | -0.9889287 | Zfp9               |
| ENSRNOG00000014490 | 134.914926 | -0.9856343 | Bdh2               |
| ENSRNOG00000012733 | 325.843403 | -0.9846821 | Ankrd12            |
| ENSRNOG00000028623 | 808.826842 | -0.9830159 | Agpat5             |
| ENSRNOG00000025691 | 100.577107 | -0.9812152 | Pla2g7             |
| ENSRNOG00000027811 | 192.410292 | -0.9801475 | Lilrb4             |
| ENSRNOG00000010529 | 3815.73685 | -0.9796695 | Thbs2              |
| ENSRNOG00000007937 | 388.61651  | -0.9795981 | Krit1              |
| ENSRNOG00000019336 | 113.069603 | -0.9792025 | Gata3              |
| ENSRNOG00000005464 | 1356.44573 | -0.9781827 | Lgalsl             |
| ENSRNOG00000016848 | 1883.90115 | -0.976416  | Fzd4               |
| ENSRNOG00000016496 | 1011.1071  | -0.9763943 | Ctsc               |
| ENSRNOG00000010827 | 237.339088 | -0.9732599 | Ptbp2              |
| ENSRNOG00000003261 | 4109.78128 | -0.9715193 | Usp9x              |
| ENSRNOG00000002947 | 1288.63478 | -0.9702331 | Dpt                |
| ENSRNOG00000016021 | 443.771981 | -0.9686    | Lims2              |
| ENSRNOG00000014066 | 916.353684 | -0.9665759 | Jade1              |
| ENSRNOG00000002537 | 222.994664 | -0.9606794 | Wnk3               |
| ENSRNOG00000046527 | 234.860427 | -0.9602084 | Phf201l            |
| ENSRNOG00000001584 | 125.308544 | -0.9569004 | Map3k7cl           |
| ENSRNOG00000009503 | 169.294208 | -0.9536513 | Depdc1             |
| ENSRNOG00000053200 | 238.518167 | -0.9503632 | AABR07068161.<br>1 |
| ENSRNOG00000001621 | 1310.53742 | -0.9501315 | C2cd2              |
| ENSRNOG00000001959 | 177.758659 | -0.9497224 | Mx1                |
| ENSRNOG00000007377 | 1676.02476 | -0.9425526 | Slit3              |

---

---

|                     |            |            |              |
|---------------------|------------|------------|--------------|
| ENSRNOG00000043304  | 272.377949 | -0.9410707 | Apccd1       |
| ENSRNOG00000017879  | 528.572581 | -0.9316981 | Gab1         |
| ENSRNOG00000003357  | 267085.069 | -0.9304719 | Col3a1       |
| ENSRNOG00000008917  | 743.063445 | -0.9292322 | Ehbp1        |
| ENSRNOG00000013309  | 260.597588 | -0.9247671 | Pik3ap1      |
| ENSRNOG00000010233  | 22436.088  | -0.922448  | Cald1        |
| ENSRNOG00000006391  | 500.960153 | -0.9206874 | Smardc1      |
| ENSRNOG00000013426  | 388.451342 | -0.9177441 | Mrgprf       |
| ENSRNOG00000045683  | 134.438313 | -0.9174485 | LOC102553715 |
| ENSRNOG00000036592  | 135.97836  | -0.9160606 | Zfp518a      |
| ENSRNOG00000012660  | 24877.3641 | -0.9159256 | Postn        |
| ENSRNOG00000018836  | 11877.1807 | -0.912454  | RGD1559896   |
| ENSRNOG00000010274  | 1170.44825 | -0.9122355 | Smc4         |
| ENSRNOG00000014361  | 1235.40511 | -0.9116221 | Edn1         |
| ENSRNOG00000000579  | 1803.41603 | -0.9105883 | Marcks       |
| ENSRNOG00000027839  | 113.447321 | -0.9105785 | Ptk2b        |
| ENSRNOG00000010891  | 267.709668 | -0.9089683 | Lrrcc1       |
| ENSRNOG00000020456  | 3449.46056 | -0.90893   | Nucb2        |
| ENSRNOG00000001369  | 425.037902 | -0.906596  | Oas1a        |
| ENSRNOG00000030880  | 2314.00896 | -0.9008822 | Hs6st2       |
| ENSRNOG00000019875  | 718.255667 | -0.9001375 | Matr3        |
| ENSRNOG000000059166 | 109.886864 | -0.8971595 | Ldb3         |
| ENSRNOG00000020479  | 746.651672 | -0.8968457 | Pik3c2a      |
| ENSRNOG00000004268  | 279.639651 | -0.8952242 | Zfp386       |
| ENSRNOG00000008055  | 138.206843 | -0.8935592 | Ccne2        |
| ENSRNOG00000023579  | 431.056076 | -0.8926413 | Tet2         |
| ENSRNOG00000007315  | 519.733238 | -0.8921104 | Thoc2        |
| ENSRNOG00000009954  | 1454.17535 | -0.8904286 | Cacul1       |
| ENSRNOG00000012060  | 902.00325  | -0.8902568 | Gucy1b3      |
| ENSRNOG00000008626  | 690.404757 | -0.8896554 | Manea        |
| ENSRNOG000000033119 | 1010.74841 | -0.8876061 | Plcb4        |
| ENSRNOG00000019108  | 685.336058 | -0.8861118 | Rmi1         |
| ENSRNOG000000032150 | 113.71532  | -0.8845775 | Adcy2        |
| ENSRNOG000000009951 | 660.279132 | -0.880538  | Aif1l        |
| ENSRNOG00000021776  | 218.316139 | -0.8781248 | Cenpc        |
| ENSRNOG00000049097  | 467.002319 | -0.877139  | Rpl7a        |
| ENSRNOG00000000657  | 824.500806 | -0.8771135 | Nek7         |
| ENSRNOG00000009208  | 135.664477 | -0.8765401 | Pibfl        |
| ENSRNOG00000011668  | 374.301009 | -0.8753699 | Nfil3        |
| ENSRNOG00000054011  | 471.881401 | -0.8750767 | Tbc1d8b      |
| ENSRNOG00000013121  | 337.52289  | -0.8717489 | Mier3        |
| ENSRNOG00000036604  | 981.220683 | -0.8711109 | Ifit2        |
| ENSRNOG00000006227  | 509.632646 | -0.8708449 | Ifih1        |

---

|                     |            |            |                |
|---------------------|------------|------------|----------------|
| ENSRNOG00000003674  | 442.55051  | -0.8696573 | Pir            |
| ENSRNOG00000001030  | 4900.40707 | -0.8689396 | Tsc22d1        |
| ENSRNOG000000014275 | 285.397076 | -0.8686451 | AABR07026291.1 |
| ENSRNOG00000002886  | 20842.5329 | -0.868593  | Myh10          |
| ENSRNOG000000025155 | 1114.4411  | -0.8684199 | Lmtk2          |
| ENSRNOG00000004696  | 1180.82811 | -0.8658757 | Arhgap5        |
| ENSRNOG000000033220 | 407.091986 | -0.86478   | Oas1b          |
| ENSRNOG000000055567 | 342.667056 | -0.8645925 | Fmnl2          |
| ENSRNOG000000018102 | 777.827186 | -0.8644917 | Coa5           |
| ENSRNOG000000007124 | 561.318795 | -0.8637535 | Krcc1          |
| ENSRNOG000000005814 | 140.116792 | -0.8628186 | Katnbl1        |
| ENSRNOG000000004908 | 821.879789 | -0.8624599 | Smc6           |
| ENSRNOG000000022871 | 217.654519 | -0.861522  | LOC691170      |
| ENSRNOG000000004198 | 252.449456 | -0.8586605 | Stxbp6         |
| ENSRNOG000000014928 | 130.701156 | -0.8579091 | Apb1           |
| ENSRNOG000000014501 | 575.804848 | -0.8567097 | Zfp638         |
| ENSRNOG000000008788 | 385.576529 | -0.8561158 | Mpp5           |
| ENSRNOG000000002280 | 921.377676 | -0.8540381 | Sh3bgrl        |
| ENSRNOG000000014867 | 216.313901 | -0.8537019 | Synpo2         |
| ENSRNOG000000013306 | 276.56404  | -0.8532225 | Pcdh20         |
| ENSRNOG000000005917 | 1258.76438 | -0.8520172 | Pawr           |
| ENSRNOG000000032401 | 122.835533 | -0.8507359 | H3f3c          |
| ENSRNOG000000002751 | 118.532536 | -0.8498363 | Zdhhc15        |
| ENSRNOG000000018951 | 1427.4829  | -0.84836   | Col4a5         |
| ENSRNOG000000015552 | 479.960105 | -0.8459282 | Ppil4          |
| ENSRNOG000000022218 | 576.47406  | -0.8458874 | Ifi44          |
| ENSRNOG000000028585 | 1601.8485  | -0.8452242 | Tceal8         |
| ENSRNOG000000013321 | 588.099643 | -0.8448117 | Dock11         |
| ENSRNOG000000009656 | 112.160611 | -0.8432701 | Rspo1          |
| ENSRNOG000000006487 | 363.925235 | -0.8431414 | Casp8ap2       |
| ENSRNOG000000010977 | 1419.29499 | -0.8427414 | Igfbp6         |
| ENSRNOG000000011606 | 116.750931 | -0.8420109 | AABR07061825.1 |
| ENSRNOG000000028814 | 802.961714 | -0.8411235 | Oasl2          |
| ENSRNOG000000016752 | 554.688885 | -0.8409758 | Crispld2       |
| ENSRNOG000000004610 | 2773.00978 | -0.8402494 | Lum            |
| ENSRNOG000000032258 | 189.004059 | -0.8402041 | Swt1           |
| ENSRNOG000000009104 | 304.940823 | -0.8401225 | AABR07029605.1 |
| ENSRNOG000000004496 | 4082.78338 | -0.8383803 | Rock2          |
| ENSRNOG000000007821 | 765.855662 | -0.8381305 | Dyrk2          |
| ENSRNOG000000000082 | 273.82586  | -0.8355646 | Hltf           |
| ENSRNOG000000004679 | 103.24842  | -0.833271  | Figf           |

---

|                    |            |            |                    |
|--------------------|------------|------------|--------------------|
| ENSRNOG00000015334 | 314.001795 | -0.8324163 | Fcho2              |
| ENSRNOG00000010832 | 569.129782 | -0.832054  | Pdgfrl             |
| ENSRNOG00000059016 | 754.081457 | -0.8320511 | Tspan12            |
| ENSRNOG00000008659 | 3489.58102 | -0.8302486 | Arhgap21           |
| ENSRNOG00000006384 | 484.113011 | -0.8300103 | Ddx58              |
| ENSRNOG00000054901 | 299.085128 | -0.8298292 | Rif1               |
| ENSRNOG00000003242 | 224.661184 | -0.8291465 | Gulp1              |
| ENSRNOG00000016243 | 148.577727 | -0.8255637 | Casq2              |
| ENSRNOG00000008859 | 250.498456 | -0.8245133 | Tank               |
| ENSRNOG00000002730 | 438.332472 | -0.8241989 | Rgs5               |
| ENSRNOG00000010840 | 1262.40285 | -0.8228473 | Adamts13           |
| ENSRNOG00000003439 | 254.58109  | -0.8226815 | Il15               |
| ENSRNOG00000005907 | 210.184312 | -0.8223509 | Rad18              |
| ENSRNOG00000005158 | 101.700783 | -0.8220447 | Slc24a5            |
| ENSRNOG00000008941 | 3867.20263 | -0.8219694 | Ets1               |
| ENSRNOG00000012414 | 721.012882 | -0.8207207 | Rhobtb3            |
| ENSRNOG00000026186 | 588.945187 | -0.820518  | Syde2              |
| ENSRNOG00000018517 | 302.392063 | -0.8197584 | Trim21             |
| ENSRNOG00000004677 | 2474.50532 | -0.8180207 | Zeb2               |
| ENSRNOG00000011720 | 152.620483 | -0.8163119 | L3mbtl3            |
| ENSRNOG00000021206 | 115.186107 | -0.8143282 | Pla2g16            |
| ENSRNOG00000012067 | 1572.24535 | -0.8139306 | Fam111a            |
| ENSRNOG00000006789 | 432.921209 | -0.8134037 | Ddit3              |
| ENSRNOG00000018247 | 366.05414  | -0.8127638 | Dhx58              |
| ENSRNOG00000011619 | 557.091353 | -0.8114716 | Myo9a              |
| ENSRNOG00000003350 | 333.973976 | -0.8072116 | Mospd2             |
| ENSRNOG00000022141 | 443.527344 | -0.8056446 | Ctdspl2            |
| ENSRNOG00000009694 | 760.709343 | -0.8048118 | Bmp4               |
| ENSRNOG00000024705 | 638.560415 | -0.8041047 | Rarres2            |
| ENSRNOG00000028895 | 287.501844 | -0.8041013 | Rtp4               |
| ENSRNOG00000008934 | 192.739113 | -0.8032476 | Tmem65             |
| ENSRNOG00000007197 | 180.452473 | -0.8031279 | Nr1h4              |
| ENSRNOG00000039091 | 469.385021 | -0.8026195 | Pnpla8             |
| ENSRNOG00000013574 | 485.827482 | -0.8010335 | App11              |
| ENSRNOG00000056735 | 175.56954  | -0.7992857 | Zc4h2              |
| ENSRNOG00000015986 | 4868.12433 | -0.7987804 | Rassf8             |
| ENSRNOG00000036913 | 570.462756 | -0.7982717 | RGD1309621         |
| ENSRNOG00000010107 | 2207.96715 | -0.7980679 | AABR07025295.<br>1 |
| ENSRNOG00000037198 | 484.079868 | -0.7946383 | Usp18              |
| ENSRNOG00000014031 | 173.54895  | -0.7932565 | Esco1              |
| ENSRNOG00000005391 | 193.848414 | -0.7925756 | Prex2              |
| ENSRNOG00000052775 | 202.51426  | -0.7898744 | RGD1305938         |

---



---

|                    |            |            |                    |
|--------------------|------------|------------|--------------------|
| ENSRNOG00000017684 | 172.466543 | -0.7897403 | Fbxl22             |
| ENSRNOG00000018937 | 781.626763 | -0.7887653 | Gstm2              |
| ENSRNOG00000010077 | 1117.74486 | -0.7885576 | Smardc3            |
| ENSRNOG00000047133 | 136.476157 | -0.7882552 | Jrkl               |
| ENSRNOG00000014791 | 1356.81535 | -0.78779   | Peg3               |
| ENSRNOG00000006632 | 1053.84534 | -0.7876067 | Rps6ka3            |
| ENSRNOG00000052247 | 387.318904 | -0.7852589 | Manba              |
| ENSRNOG00000005854 | 139.774905 | -0.7838483 | Angpt1             |
| ENSRNOG00000001825 | 105.012696 | -0.7838218 | AABR07034767.<br>1 |
| ENSRNOG00000011016 | 776.131501 | -0.7835963 | Slc7a2             |
| ENSRNOG00000008314 | 268.049581 | -0.7835144 | Orc3               |
| ENSRNOG00000039183 | 168.604612 | -0.7826788 | Cip2a              |
| ENSRNOG00000059243 | 142.613124 | -0.7818899 | AABR07051787.<br>1 |
| ENSRNOG00000013917 | 1255.32181 | -0.7815848 | Igsf10             |
| ENSRNOG00000016208 | 188.276251 | -0.7808554 | Setbp1             |
| ENSRNOG00000055225 | 122.022763 | -0.7795912 | RF02266            |
| ENSRNOG00000031801 | 886.852228 | -0.7782433 | Ephb3              |
| ENSRNOG00000006324 | 438.250492 | -0.7782317 | Trpc6              |
| ENSRNOG00000006749 | 491.57185  | -0.7779508 | Tmtc3              |
| ENSRNOG00000022769 | 322.437281 | -0.7778367 | Sp100              |
| ENSRNOG00000015577 | 165.656032 | -0.7766124 | Lpar6              |
| ENSRNOG00000025042 | 568.174388 | -0.7765338 | Pde3a              |
| ENSRNOG00000011586 | 558.648172 | -0.7739694 | LOC100909712       |
| ENSRNOG00000011859 | 437.698722 | -0.7731094 | Eif5a2             |
| ENSRNOG00000010744 | 2223.1089  | -0.7723509 | Nrp1               |
| ENSRNOG00000008445 | 974.628127 | -0.7718003 | Dact1              |
| ENSRNOG00000025539 | 175.859024 | -0.7714945 | Vps13a             |
| ENSRNOG00000009338 | 332.801429 | -0.770692  | Kras               |
| ENSRNOG00000043387 | 2232.65972 | -0.7696349 | Cpe                |
| ENSRNOG00000008039 | 528.932547 | -0.7682223 | Cul5               |
| ENSRNOG00000004033 | 567.662988 | -0.768166  | Sema6a             |
| ENSRNOG00000010966 | 57097.5269 | -0.7678147 | Itgb1              |
| ENSRNOG00000004304 | 612.089257 | -0.7669548 | Syap1              |
| ENSRNOG00000003825 | 987.469265 | -0.7664697 | Wdr75              |
| ENSRNOG00000017980 | 128.854483 | -0.7664423 | Itgal              |
| ENSRNOG00000053196 | 1038.89447 | -0.7659827 | Slc48a1            |
| ENSRNOG00000054669 | 273.598565 | -0.7657961 | RGD1305110         |
| ENSRNOG00000009311 | 481.515238 | -0.7641022 | Fstl3              |
| ENSRNOG00000009990 | 962.475934 | -0.7627577 | Zranb2             |
| ENSRNOG00000005730 | 279.626774 | -0.7626016 | Pcmd1              |
| ENSRNOG00000001317 | 336.404094 | -0.7624005 | Zfp68              |
| ENSRNOG00000015691 | 129.045259 | -0.7623875 | Fam212b            |

---

---

|                    |            |            |          |
|--------------------|------------|------------|----------|
| ENSRNOG00000008151 | 468.591857 | -0.7615193 | Plscr4   |
| ENSRNOG00000020024 | 272.787964 | -0.7609964 | Taf7     |
| ENSRNOG00000007662 | 202.214112 | -0.760145  | Zfp800   |
| ENSRNOG00000057464 | 734.543572 | -0.7599841 | Fmr1     |
| ENSRNOG00000005070 | 226.356766 | -0.7590172 | Spopl    |
| ENSRNOG00000015255 | 166.13794  | -0.757992  | Haus3    |
| ENSRNOG00000011951 | 4710.87162 | -0.7571883 | Plk2     |
| ENSRNOG00000020904 | 469.990459 | -0.7569929 | Cdc42ep2 |
| ENSRNOG00000007682 | 147.443881 | -0.7554869 | Gria3    |
| ENSRNOG00000014426 | 11773.396  | -0.7545532 | Lox      |
| ENSRNOG00000011137 | 181.797533 | -0.7542148 | Zbtb41   |
| ENSRNOG00000045740 | 613.420868 | -0.7528506 | Tmx3     |
| ENSRNOG00000014673 | 151.441464 | -0.7524992 | Eri2     |
| ENSRNOG00000006432 | 356.055405 | -0.7524738 | Trnt1    |
| ENSRNOG00000009980 | 2375.78066 | -0.7503674 | Plpp1    |
| ENSRNOG00000021242 | 348.640813 | 0.75017846 | Adam33   |
| ENSRNOG00000032238 | 1571.1491  | 0.75211836 | Plcd1    |
| ENSRNOG00000020481 | 339.480999 | 0.75299756 | Pafah1b3 |
| ENSRNOG00000031420 | 928.444094 | 0.75413229 | Hyal2    |
| ENSRNOG00000025619 | 202.912696 | 0.75521995 | Ap1g2    |
| ENSRNOG00000020657 | 4790.37554 | 0.75711118 | Shc1     |
| ENSRNOG00000016560 | 603.585129 | 0.76038084 | Card19   |
| ENSRNOG00000017328 | 155.137756 | 0.76072926 | Pter     |
| ENSRNOG00000007818 | 595.144625 | 0.76159946 | Slc45a4  |
| ENSRNOG00000008243 | 375.827231 | 0.76166306 | Slc43a1  |
| ENSRNOG00000015439 | 4996.56861 | 0.76223908 | Man2a1   |
| ENSRNOG00000007412 | 281.860881 | 0.76302153 | Dok1     |
| ENSRNOG00000000177 | 419.130713 | 0.76403532 | Plpp2    |
| ENSRNOG00000015118 | 192.090444 | 0.76421553 | Cpped1   |
| ENSRNOG00000013946 | 830.867148 | 0.76465821 | Rnf149   |
| ENSRNOG00000004903 | 455.417189 | 0.76503708 | Ebp      |
| ENSRNOG00000014504 | 5922.38445 | 0.765143   | Il1r1    |
| ENSRNOG00000004258 | 234.527887 | 0.76649757 | Chst7    |
| ENSRNOG00000054549 | 2206.81384 | 0.76679148 | Lss      |
| ENSRNOG00000019388 | 544.645153 | 0.76778518 | Egfl7    |
| ENSRNOG00000027880 | 159.847133 | 0.76822507 | Nbeal2   |
| ENSRNOG00000018659 | 3251.31829 | 0.76893    | Csfl     |
| ENSRNOG00000007230 | 165.948662 | 0.76897088 | Kank3    |
| ENSRNOG00000052157 | 354.214623 | 0.77106499 | Nav3     |
| ENSRNOG00000002969 | 582.828583 | 0.77242104 | Itpkb    |
| ENSRNOG00000007993 | 267.263479 | 0.77251326 | Sh3tc1   |
| ENSRNOG00000017463 | 250.35015  | 0.77332913 | Bloc1s3  |
| ENSRNOG00000031743 | 411.265165 | 0.77451136 | Gbp2     |

---

---

|                    |            |            |              |
|--------------------|------------|------------|--------------|
| ENSRNOG00000018785 | 129.071124 | 0.77517045 | Slc16a13     |
| ENSRNOG00000020238 | 437.164351 | 0.77532051 | Plekhh3      |
| ENSRNOG00000024566 | 317.212904 | 0.77551589 | Sh3d21       |
| ENSRNOG00000046560 | 752.396511 | 0.77696024 | AC109096.1   |
| ENSRNOG00000009037 | 4676.20477 | 0.77736958 | Sulf1        |
| ENSRNOG00000013604 | 2383.07658 | 0.77982585 | Gpx4         |
| ENSRNOG00000029333 | 177.893633 | 0.78025159 | Echdc2       |
| ENSRNOG00000057619 | 159.492175 | 0.78035408 | LOC100912068 |
| ENSRNOG00000051039 | 232.926117 | 0.78232886 | LOC108349594 |
| ENSRNOG00000043102 | 469.744751 | 0.7833876  | Bahcc1       |
| ENSRNOG00000008012 | 276.746057 | 0.78718136 | Abcb1b       |
| ENSRNOG00000049937 | 225.385037 | 0.78934598 | Pdxk         |
| ENSRNOG00000017839 | 795.555642 | 0.79317838 | Erccl        |
| ENSRNOG00000021185 | 433.403221 | 0.79371389 | Bola1        |
| ENSRNOG00000018019 | 165.019854 | 0.79487341 | Hspa12a      |
| ENSRNOG00000026519 | 1846.6958  | 0.79523624 | LOC100364062 |
| ENSRNOG00000018237 | 5080.22184 | 0.79757001 | Gstp1        |
| ENSRNOG00000013783 | 3207.44028 | 0.79803232 | Efh2         |
| ENSRNOG00000002322 | 211.049889 | 0.79866851 | RGD1310587   |
| ENSRNOG00000048915 | 355.007771 | 0.79899136 | Twf2         |
| ENSRNOG00000018778 | 566.381388 | 0.79981649 | Cadm1        |
| ENSRNOG00000026435 | 133.668528 | 0.80070875 | Arid3a       |
| ENSRNOG00000010882 | 1120.6685  | 0.80184039 | Sptlc1       |
| ENSRNOG00000039745 | 101.872526 | 0.80387804 | Pm20d1       |
| ENSRNOG00000001928 | 479.85038  | 0.80406336 | Il1rap       |
| ENSRNOG00000032788 | 990.177545 | 0.80415096 | Dysf         |
| ENSRNOG00000018874 | 331.582659 | 0.80487929 | Phf19        |
| ENSRNOG00000001729 | 611.489093 | 0.80517346 | Xxylt1       |
| ENSRNOG00000022067 | 258.653602 | 0.80554131 | Tlr5         |
| ENSRNOG00000021812 | 150.583616 | 0.80572333 | Scx          |
| ENSRNOG00000010058 | 2665.03377 | 0.805752   | Spry2        |
| ENSRNOG00000053498 | 331.752134 | 0.80720908 | Dnajc22      |
| ENSRNOG00000050478 | 150.343553 | 0.8085257  | LOC102549173 |
| ENSRNOG00000009068 | 5446.49349 | 0.80871404 | Phlda3       |
| ENSRNOG00000024410 | 433.808702 | 0.80951227 | Blvrb        |
| ENSRNOG00000020088 | 359.229969 | 0.81169831 | Klhl26       |
| ENSRNOG00000024349 | 182.642583 | 0.81220971 | Cbap         |
| ENSRNOG00000053272 | 350.360649 | 0.81411238 | Chi3l1       |
| ENSRNOG00000029141 | 258.623696 | 0.81440123 | Trabd2b      |
| ENSRNOG00000001229 | 5784.40579 | 0.81442017 | Col18a1      |
| ENSRNOG00000000967 | 2045.69856 | 0.82327338 | Aacs         |
| ENSRNOG00000004863 | 129.618347 | 0.82345979 | Mpped2       |
| ENSRNOG00000003144 | 334.814645 | 0.82393595 | Gprc5c       |

---

---

|                    |            |            |              |
|--------------------|------------|------------|--------------|
| ENSRNOG00000011329 | 23223.3526 | 0.82600697 | Pkm          |
| ENSRNOG00000016544 | 153.70181  | 0.8271962  | Arhgef28     |
| ENSRNOG00000019211 | 4317.69437 | 0.8280653  | Olfml3       |
| ENSRNOG00000011967 | 250.841126 | 0.83168449 | Nphp4        |
| ENSRNOG00000005053 | 168.107048 | 0.83543919 | Egln3        |
| ENSRNOG00000012772 | 843.608223 | 0.8379278  | Nqo1         |
| ENSRNOG00000013659 | 925.117383 | 0.83868231 | Tex2         |
| ENSRNOG00000059956 | 239.414868 | 0.84117437 | Bcl6b        |
| ENSRNOG00000014963 | 184.714576 | 0.84378974 | Adgrg1       |
| ENSRNOG00000015113 | 117.429929 | 0.84574371 | Mocos        |
| ENSRNOG00000004110 | 1342.66991 | 0.84680848 | Trib2        |
| ENSRNOG00000023348 | 165.664513 | 0.84709223 | Tbc1d2       |
| ENSRNOG00000055527 | 198.025068 | 0.84800884 | Arap3        |
| ENSRNOG00000005935 | 1347.44468 | 0.84802618 | A3galt2      |
| ENSRNOG00000033235 | 561.003965 | 0.84853588 | Relb         |
| ENSRNOG00000025448 | 1268.58686 | 0.84986576 | Limd2        |
| ENSRNOG00000004367 | 1911.19404 | 0.85023426 | Elk3         |
| ENSRNOG00000020726 | 1818.49137 | 0.85058332 | Sipa1        |
| ENSRNOG00000025143 | 100.319814 | 0.85144081 | Icam2        |
| ENSRNOG00000005393 | 393.484158 | 0.85278159 | Sertad2      |
| ENSRNOG00000029614 | 846.787534 | 0.85352261 | Robo1        |
| ENSRNOG00000017212 | 301.579434 | 0.85402877 | Spsb1        |
| ENSRNOG00000008936 | 795.826634 | 0.85470771 | Map3k6       |
| ENSRNOG00000049965 | 218.826683 | 0.85494864 | LOC103693608 |
| ENSRNOG00000001214 | 3939.12649 | 0.85691798 | Pfkl         |
| ENSRNOG00000018669 | 328.977478 | 0.85840131 | Jak3         |
| ENSRNOG00000009419 | 1569.59405 | 0.85849257 | Ptprg        |
| ENSRNOG00000028801 | 282.80868  | 0.85899923 | Gsap         |
| ENSRNOG00000013668 | 2943.88063 | 0.86058569 | Capg         |
| ENSRNOG00000045558 | 1038.35301 | 0.86454903 | Cd34         |
| ENSRNOG00000010629 | 768.170939 | 0.86519503 | Nod1         |
| ENSRNOG00000050108 | 192.23202  | 0.86535641 | LOC100911319 |
| ENSRNOG00000007827 | 250.843535 | 0.86837581 | Cox4i2       |
| ENSRNOG00000021174 | 112.341483 | 0.86885152 | Macrodl      |
| ENSRNOG00000019698 | 1336.45752 | 0.86951535 | Ssbp4        |
| ENSRNOG00000010165 | 5349.58122 | 0.86997612 | Tnfaip2      |
| ENSRNOG00000008048 | 704.534984 | 0.87049062 | Plscr1       |
| ENSRNOG00000013552 | 3909.61764 | 0.87176378 | Scd          |
| ENSRNOG00000015618 | 268.136683 | 0.87453761 | Wnt5a        |
| ENSRNOG00000010213 | 209.361536 | 0.8774042  | Fgd5         |
| ENSRNOG00000036693 | 584.779255 | 0.88083555 | Slc25a10     |
| ENSRNOG00000012108 | 126.474018 | 0.88146173 | Thsd1        |
| ENSRNOG00000018397 | 139.05283  | 0.88461296 | Dnph1        |

---

---

|                    |            |            |                    |
|--------------------|------------|------------|--------------------|
| ENSRNOG00000017610 | 498.365095 | 0.88747092 | Nedd41             |
| ENSRNOG00000013069 | 552.515585 | 0.88801831 | Sapcd2             |
| ENSRNOG00000010580 | 1477.21725 | 0.88884334 | Acot7              |
| ENSRNOG00000012939 | 306.364558 | 0.88906127 | Abca7              |
| ENSRNOG00000004273 | 3904.95772 | 0.89335575 | Ifitm1             |
| ENSRNOG00000010170 | 8474.52705 | 0.89489131 | Tubb4b             |
| ENSRNOG00000000503 | 1101.10492 | 0.89756731 | Ppard              |
| ENSRNOG00000028415 | 2456.24825 | 0.89811548 | Cdc20              |
| ENSRNOG00000029768 | 325.451396 | 0.89989376 | Ccl12              |
| ENSRNOG00000016846 | 742.268503 | 0.90039182 | Pik3cd             |
| ENSRNOG00000013720 | 8193.40487 | 0.90112373 | Aebp1              |
| ENSRNOG00000021104 | 5655.74488 | 0.90129026 | Emp3               |
| ENSRNOG00000007027 | 148.582073 | 0.90163248 | Hgf                |
| ENSRNOG00000007582 | 948.693219 | 0.90177709 | Zswim4             |
| ENSRNOG00000019265 | 210.533321 | 0.90294197 | Pcdh12             |
| ENSRNOG00000020173 | 1140.58418 | 0.90494102 | Tie1               |
| ENSRNOG00000017146 | 664.383744 | 0.90551523 | Nfatc1             |
| ENSRNOG00000061876 | 1528.27147 | 0.90616012 | Tas1r2             |
| ENSRNOG00000016968 | 1431.10279 | 0.90630609 | Gramd4             |
| ENSRNOG00000036677 | 593.239126 | 0.90739152 | Slc16a3            |
| ENSRNOG00000005731 | 146.157317 | 0.90896932 | Birc3              |
| ENSRNOG00000000787 | 178.579309 | 0.91056811 | AABR07044364.<br>1 |
| ENSRNOG00000018384 | 4581.90846 | 0.91136358 | Adam12             |
| ENSRNOG00000009712 | 1375.19075 | 0.91195356 | Gale               |
| ENSRNOG00000029330 | 115.278481 | 0.91356071 | Ca5b               |
| ENSRNOG00000020533 | 22100.9232 | 0.91415449 | Htral              |
| ENSRNOG00000012216 | 334.979316 | 0.91576886 | Tgfb1              |
| ENSRNOG00000004888 | 445.439544 | 0.91581336 | Spred2             |
| ENSRNOG00000015495 | 235.512337 | 0.91630399 | Slc25a37           |
| ENSRNOG00000028569 | 121.368013 | 0.91802549 | Arhgap27           |
| ENSRNOG00000017197 | 297.289469 | 0.91807204 | Pdgfb              |
| ENSRNOG00000025527 | 637.817407 | 0.92130077 | Mtcl1              |
| ENSRNOG00000007060 | 2975.53142 | 0.92282671 | Plin2              |
| ENSRNOG00000024818 | 3772.37713 | 0.92380802 | Eva1b              |
| ENSRNOG00000036649 | 390.388031 | 0.92486153 | Pwwp2b             |
| ENSRNOG00000021438 | 1123.46645 | 0.92593909 | Tuba1c             |
| ENSRNOG00000052296 | 409.018578 | 0.93333146 | Shank3             |
| ENSRNOG00000011781 | 825.033217 | 0.93422682 | Oplah              |
| ENSRNOG00000049437 | 1542.40963 | 0.93474114 | Gpc1               |
| ENSRNOG00000024703 | 740.665899 | 0.93507774 | Dock5              |
| ENSRNOG00000014243 | 2049.14084 | 0.93546014 | Pear1              |
| ENSRNOG00000003650 | 140.127043 | 0.93713577 | Nt5c               |

---

---

|                    |            |            |                    |
|--------------------|------------|------------|--------------------|
| ENSRNOG00000011321 | 757.648422 | 0.93757591 | Rftn1              |
| ENSRNOG00000045779 | 290.595957 | 0.93854831 | AABR07039210.<br>2 |
| ENSRNOG00000008401 | 191.51418  | 0.93872898 | Card10             |
| ENSRNOG00000013581 | 1158.29949 | 0.94111373 | Extl3              |
| ENSRNOG00000000151 | 675.793149 | 0.941919   | Ldlrap1            |
| ENSRNOG00000002810 | 1720.41968 | 0.94329532 | Gfpt2              |
| ENSRNOG00000057153 | 573.972244 | 0.94347957 | Pla1a              |
| ENSRNOG00000048932 | 160.815108 | 0.94405407 | Smagp              |
| ENSRNOG00000059015 | 1516.46283 | 0.9451493  | Triobp             |
| ENSRNOG00000011969 | 468.254314 | 0.94532425 | Dock9              |
| ENSRNOG00000009850 | 1079.99534 | 0.9458898  | St3gal4            |
| ENSRNOG00000019048 | 4236.29609 | 0.94825387 | Sod2               |
| ENSRNOG00000004049 | 401.720496 | 0.94927119 | Baiap2             |
| ENSRNOG00000007946 | 1924.99573 | 0.95147537 | Bcl2l1             |
| ENSRNOG00000056585 | 4240.50262 | 0.9537615  | Fscn1              |
| ENSRNOG00000018992 | 8555.9044  | 0.95451951 | Dpysl3             |
| ENSRNOG00000012952 | 698.734873 | 0.957657   | Lrig1              |
| ENSRNOG00000020401 | 455.985602 | 0.95939068 | Adecy4             |
| ENSRNOG00000012950 | 142.312523 | 0.963241   | Efr3b              |
| ENSRNOG00000018964 | 1168.60025 | 0.964406   | Gss                |
| ENSRNOG00000009870 | 141.084579 | 0.9657103  | Tmem88             |
| ENSRNOG00000019741 | 830.693193 | 0.96581153 | Isyna1             |
| ENSRNOG00000023007 | 187.701494 | 0.96603431 | Col6a6             |
| ENSRNOG00000003635 | 425.501622 | 0.96715835 | Disp1              |
| ENSRNOG00000015583 | 481.461622 | 0.97022931 | Dnal4              |
| ENSRNOG00000021102 | 172.239956 | 0.97060749 | Scn1b              |
| ENSRNOG00000021447 | 210.329914 | 0.97077777 | Prr7               |
| ENSRNOG00000022309 | 1039.51664 | 0.97109576 | Frem1              |
| ENSRNOG00000061519 | 528.085293 | 0.97170076 | Asap2              |
| ENSRNOG00000049361 | 943.56753  | 0.97183875 | Gas7               |
| ENSRNOG00000000502 | 205.06332  | 0.97202191 | Def6               |
| ENSRNOG00000019689 | 222.029864 | 0.97394568 | Vwf                |
| ENSRNOG00000013324 | 1452.02889 | 0.97457442 | Cdh5               |
| ENSRNOG00000002511 | 167.246745 | 0.97616097 | Flt4               |
| ENSRNOG00000011411 | 242.793835 | 0.97865269 | Adgrg6             |
| ENSRNOG00000013376 | 1634.00018 | 0.98119052 | Mvd                |
| ENSRNOG00000009370 | 188.769183 | 0.98379261 | Tbkbp1             |
| ENSRNOG00000028036 | 2644.01645 | 0.98404817 | Adamts7            |
| ENSRNOG00000016701 | 242.723919 | 0.98530558 | Gng8               |
| ENSRNOG00000015971 | 1073.54056 | 0.98684017 | Slc12a2            |
| ENSRNOG00000008215 | 2141.26574 | 0.99208496 | Trim47             |
| ENSRNOG00000045999 | 111.310534 | 0.99363344 | Tnfaip8l1          |

---

---

|                     |            |            |                |
|---------------------|------------|------------|----------------|
| ENSRNOG00000058364  | 113.929643 | 0.99376068 | AABR07051515.1 |
| ENSRNOG00000007541  | 2085.5941  | 0.99623591 | Fhl3           |
| ENSRNOG000000049056 | 142.976436 | 0.99704118 | AABR07051450.1 |
| ENSRNOG00000013196  | 109.367349 | 1.00591112 | Dok5           |
| ENSRNOG00000019403  | 603.307675 | 1.00933305 | Afap111        |
| ENSRNOG00000060381  | 1480.79187 | 1.01282147 | Col15a1        |
| ENSRNOG00000020277  | 269.257801 | 1.01352855 | Cntnap1        |
| ENSRNOG00000007324  | 1153.45207 | 1.01691461 | Plxna2         |
| ENSRNOG00000021125  | 3683.97472 | 1.01710945 | Prdx5          |
| ENSRNOG00000052795  | 1199.58806 | 1.02112785 | Itpr3          |
| ENSRNOG00000017489  | 266.929817 | 1.02117972 | Gse1           |
| ENSRNOG00000024688  | 522.887905 | 1.02213119 | Erfe           |
| ENSRNOG00000006615  | 2149.4677  | 1.02384637 | Mtap           |
| ENSRNOG00000003064  | 375.037551 | 1.02523478 | Bst1           |
| ENSRNOG00000004019  | 987.3165   | 1.03381529 | Phlda1         |
| ENSRNOG00000013545  | 1920.27055 | 1.03416596 | Polr2e         |
| ENSRNOG00000015967  | 1887.31794 | 1.03719572 | Sh3bgrl3       |
| ENSRNOG00000015455  | 478.52653  | 1.03741562 | Spr            |
| ENSRNOG00000054374  | 166.523663 | 1.0385939  | Smim29         |
| ENSRNOG00000013463  | 238.862389 | 1.04125348 | Kenj8          |
| ENSRNOG00000020703  | 1007.90344 | 1.04183479 | Sipa113        |
| ENSRNOG00000047924  | 156.674945 | 1.04536806 | Zbtb7c         |
| ENSRNOG00000009113  | 926.292795 | 1.04664097 | Marcks11       |
| ENSRNOG00000037909  | 2212.96518 | 1.04690329 | Ppm1f          |
| ENSRNOG00000016257  | 4313.49527 | 1.04735209 | Cotl1          |
| ENSRNOG00000009862  | 240.627517 | 1.04759683 | Olfm1          |
| ENSRNOG00000003088  | 928.76117  | 1.04936176 | Arhgap31       |
| ENSRNOG00000024846  | 2536.58875 | 1.04941318 | Ier51          |
| ENSRNOG00000002093  | 1037.87489 | 1.05116445 | Tgfb3          |
| ENSRNOG00000005861  | 2290.19602 | 1.05270312 | Hsd11b1        |
| ENSRNOG00000009348  | 556.258926 | 1.05402489 | Nos3           |
| ENSRNOG00000006867  | 147.057872 | 1.05833122 | Etv1           |
| ENSRNOG00000007567  | 929.361394 | 1.0591489  | Rem1           |
| ENSRNOG00000004823  | 287.183281 | 1.06001631 | Dock4          |
| ENSRNOG00000017434  | 311.604777 | 1.06038747 | Mgat3          |
| ENSRNOG00000010111  | 154.782491 | 1.06211175 | Exoc3l4        |
| ENSRNOG00000008425  | 2320.86227 | 1.06313686 | Nav1           |
| ENSRNOG00000006548  | 5345.93338 | 1.06358435 | Mrc2           |
| ENSRNOG00000037113  | 1500.14585 | 1.069409   | Slfn2          |
| ENSRNOG00000014648  | 1305.9005  | 1.0713877  | Efnb2          |
| ENSRNOG00000004482  | 126.552003 | 1.07232415 | Ccdc88c        |
| ENSRNOG00000018452  | 186.820024 | 1.08348434 | Unc13a         |

---

---

|                    |            |            |            |
|--------------------|------------|------------|------------|
| ENSRNOG00000028650 | 2127.2776  | 1.0893206  | Inf2       |
| ENSRNOG00000021916 | 121.888074 | 1.09014075 | Slc16a12   |
| ENSRNOG00000006033 | 358.873982 | 1.0908557  | Spon2      |
| ENSRNOG00000017208 | 3200.209   | 1.09712498 | Cspg4      |
| ENSRNOG00000014357 | 330.726125 | 1.09750296 | Gja4       |
| ENSRNOG00000002926 | 2494.63685 | 1.10006778 | Uap1       |
| ENSRNOG00000005024 | 528.460498 | 1.10189369 | Cdkn2aipnl |
| ENSRNOG00000020573 | 172.095509 | 1.10473162 | Efna1      |
| ENSRNOG00000003069 | 1313.63684 | 1.10829703 | Cd38       |
| ENSRNOG00000001442 | 2793.93619 | 1.10996435 | Por        |
| ENSRNOG00000004560 | 223.784787 | 1.11045678 | Cacna1b    |
| ENSRNOG00000008133 | 104.27044  | 1.11696362 | Mfng       |
| ENSRNOG00000007254 | 249.882349 | 1.12003724 | Ttc9       |
| ENSRNOG00000001728 | 250.034061 | 1.12105144 | Fam43a     |
| ENSRNOG00000003120 | 5153.20844 | 1.12325494 | Prelp      |
| ENSRNOG00000001785 | 1184.81297 | 1.1260391  | Etv5       |
| ENSRNOG00000021441 | 413.494331 | 1.12840065 | Reln       |
| ENSRNOG00000037931 | 737.920371 | 1.1410126  | Plaur      |
| ENSRNOG00000000187 | 328.304249 | 1.14453112 | Csf2rb     |
| ENSRNOG00000049471 | 396.623341 | 1.1456627  | Steap3     |
| ENSRNOG00000007839 | 154.145633 | 1.15381827 | Slc16a7    |
| ENSRNOG00000016326 | 772.945559 | 1.16050033 | Cx3cl1     |
| ENSRNOG00000038784 | 490.874624 | 1.16126031 | Piezo2     |
| ENSRNOG00000022392 | 481.553149 | 1.16455011 | Hspb8      |
| ENSRNOG00000011775 | 110.4816   | 1.16517919 | Mfap3l     |
| ENSRNOG00000014197 | 355.178874 | 1.16689108 | Tmem51     |
| ENSRNOG00000026902 | 100.198782 | 1.16805301 | Lyve1      |
| ENSRNOG00000004757 | 298.453073 | 1.17367865 | Tmem158    |
| ENSRNOG00000024243 | 591.351611 | 1.1810291  | Cadm4      |
| ENSRNOG00000021062 | 1197.04894 | 1.1823727  | Fxyd5      |
| ENSRNOG00000021004 | 214.281248 | 1.18274532 | Rasip1     |
| ENSRNOG00000059344 | 2093.14252 | 1.18299796 | Tpen1      |
| ENSRNOG00000026053 | 435.197215 | 1.18304265 | Grem1      |
| ENSRNOG00000048291 | 878.755626 | 1.18413154 | Tbcc       |
| ENSRNOG00000002771 | 111.820403 | 1.18578444 | Ereg       |
| ENSRNOG00000020193 | 224.614646 | 1.18717721 | Runx2      |
| ENSRNOG00000010417 | 170.650296 | 1.18920549 | Nol4l      |
| ENSRNOG00000014658 | 167.358286 | 1.19431204 | Zfp423     |
| ENSRNOG00000013064 | 775.598536 | 1.19572117 | Lrp8       |
| ENSRNOG00000030404 | 381.664202 | 1.19882629 | Arrb1      |
| ENSRNOG00000021244 | 716.741201 | 1.20065564 | Hspa12b    |
| ENSRNOG00000042905 | 592.9691   | 1.20271306 | RT1-T24-4  |
| ENSRNOG00000007687 | 317.211842 | 1.21044855 | Sema7a     |

---



---

|                    |            |            |         |
|--------------------|------------|------------|---------|
| ENSRNOG00000019752 | 1040.60319 | 1.22008129 | Slc29a1 |
| ENSRNOG00000013927 | 119.597339 | 1.22047251 | Jag2    |
| ENSRNOG00000005287 | 437.455777 | 1.22544952 | Syne3   |
| ENSRNOG00000000569 | 293.767191 | 1.22565809 | Vsir    |
| ENSRNOG00000001314 | 3870.8876  | 1.22640945 | Fam20c  |
| ENSRNOG00000010753 | 813.809271 | 1.22773636 | Aig1    |
| ENSRNOG00000008099 | 231.445321 | 1.23041261 | Galnt12 |
| ENSRNOG00000008885 | 1039.11695 | 1.2414205  | Chst11  |
| ENSRNOG00000016248 | 331.769959 | 1.24491634 | Sox18   |
| ENSRNOG00000016980 | 136.170581 | 1.24639883 | Qprt    |
| ENSRNOG00000051564 | 898.708146 | 1.24717054 | Rap2a   |
| ENSRNOG00000011914 | 548.450119 | 1.249046   | Dtnb    |
| ENSRNOG00000006877 | 2034.06373 | 1.24990243 | Efnb1   |
| ENSRNOG00000011101 | 609.663435 | 1.25667511 | Twist1  |
| ENSRNOG00000009389 | 905.292429 | 1.25798584 | Ripk2   |
| ENSRNOG00000017149 | 1084.72941 | 1.25893719 | Fam131b |
| ENSRNOG00000023536 | 398.448505 | 1.26888785 | Adgrd1  |
| ENSRNOG00000004417 | 184.510778 | 1.26971245 | Fam117a |
| ENSRNOG00000028198 | 3003.05711 | 1.27188393 | Sh2b3   |
| ENSRNOG00000019536 | 732.255778 | 1.28022667 | Smim3   |
| ENSRNOG00000047300 | 138.63013  | 1.28333783 | Bdkrb2  |
| ENSRNOG00000011921 | 971.447197 | 1.29184218 | Dusp4   |
| ENSRNOG00000009369 | 844.23219  | 1.29792398 | Tor4a   |
| ENSRNOG00000060410 | 444.070095 | 1.30095913 | Pcdh1   |
| ENSRNOG00000010718 | 1019.08587 | 1.32060194 | Gpr153  |
| ENSRNOG00000055751 | 464.623429 | 1.3216973  | P3h2    |
| ENSRNOG00000006604 | 1721.86685 | 1.32423204 | Thy1    |
| ENSRNOG00000042411 | 162.236633 | 1.32463733 | Rps6ka1 |
| ENSRNOG00000009222 | 739.616639 | 1.32977035 | Epha2   |
| ENSRNOG00000031232 | 3452.37467 | 1.33255028 | Nrp2    |
| ENSRNOG00000000442 | 329.223624 | 1.33539235 | Notch4  |
| ENSRNOG00000055305 | 1244.46838 | 1.33674128 | Parvb   |
| ENSRNOG00000046848 | 251.751104 | 1.34230321 | PCOLCE2 |
| ENSRNOG00000012830 | 356.980505 | 1.35109047 | Paqr8   |
| ENSRNOG00000015441 | 1809.4798  | 1.3577386  | Il4r    |
| ENSRNOG00000014776 | 988.356677 | 1.36728053 | Adecy7  |
| ENSRNOG00000003866 | 314.905489 | 1.37781037 | Cxcr4   |
| ENSRNOG00000013791 | 2832.42819 | 1.37930069 | Enpp3   |
| ENSRNOG00000003732 | 1551.0737  | 1.38154631 | Flrt2   |
| ENSRNOG00000012049 | 154.997653 | 1.38742022 | Sox7    |
| ENSRNOG00000033090 | 3743.74435 | 1.38900833 | Ltbp1   |
| ENSRNOG00000012782 | 2427.73941 | 1.39223058 | Tmem2   |
| ENSRNOG00000001065 | 2212.37944 | 1.40023516 | Cyth3   |

---

---

|                    |            |            |                    |
|--------------------|------------|------------|--------------------|
| ENSRNOG00000034177 | 128.882767 | 1.40187798 | Efna5              |
| ENSRNOG00000011228 | 176.36456  | 1.40405196 | Layn               |
| ENSRNOG00000051915 | 313.155272 | 1.40759928 | Spred3             |
| ENSRNOG00000033835 | 765.346841 | 1.41180369 | Dnm1               |
| ENSRNOG00000010635 | 2111.12933 | 1.41310321 | Igfbp4             |
| ENSRNOG00000026136 | 179.330668 | 1.41744433 | Tnfaip8            |
| ENSRNOG00000007118 | 108.957346 | 1.41886877 | Eva1a              |
| ENSRNOG00000021750 | 1075.71312 | 1.41912796 | Id1                |
| ENSRNOG00000024594 | 163.336297 | 1.42363537 | Fhdc1              |
| ENSRNOG00000000805 | 966.647574 | 1.43272097 | Gja1               |
| ENSRNOG00000014987 | 349.529696 | 1.43290746 | Mdfi               |
| ENSRNOG00000016640 | 145.244255 | 1.4362042  | Dner               |
| ENSRNOG00000014232 | 220.064156 | 1.44858114 | P2ry1              |
| ENSRNOG00000000017 | 609.503154 | 1.4531388  | Steap1             |
| ENSRNOG00000002667 | 158.014487 | 1.45636899 | Lamc2              |
| ENSRNOG00000012881 | 683.063704 | 1.46093582 | Fgl2               |
| ENSRNOG00000026647 | 1857.12599 | 1.4619828  | Cxcl16             |
| ENSRNOG00000057347 | 982.445195 | 1.46468534 | Cebpb              |
| ENSRNOG00000052564 | 9197.14097 | 1.46739265 | Gpx3               |
| ENSRNOG00000002802 | 532.990457 | 1.46800801 | Cxcl1              |
| ENSRNOG00000014011 | 159.45093  | 1.48132492 | Dll4               |
| ENSRNOG00000046829 | 254.990856 | 1.48318449 | Kdr                |
| ENSRNOG00000018752 | 172.982438 | 1.48529095 | Clcf1              |
| ENSRNOG00000003947 | 900.545773 | 1.48584509 | Ntn1               |
| ENSRNOG00000014879 | 1906.90948 | 1.48592868 | Ttc7a              |
| ENSRNOG00000037275 | 204.625791 | 1.49617608 | Tlcd2              |
| ENSRNOG00000052391 | 2044.18608 | 1.51490375 | Sh3bp5             |
| ENSRNOG00000020030 | 317.805217 | 1.54520931 | Crlf1              |
| ENSRNOG00000009354 | 117.262956 | 1.54607092 | Nrarp              |
| ENSRNOG00000016182 | 307.167846 | 1.55820429 | Tgfa               |
| ENSRNOG00000017676 | 300.370375 | 1.55992227 | Plvap              |
| ENSRNOG00000006076 | 1156.59036 | 1.58313478 | Steap2             |
| ENSRNOG00000028043 | 147.710983 | 1.58848566 | Cxcl3              |
| ENSRNOG00000009803 | 121.869346 | 1.59118617 | LOC100362176       |
| ENSRNOG00000058111 | 171.5167   | 1.59759084 | Itga2              |
| ENSRNOG00000016013 | 1298.99838 | 1.63130589 | Gprc5b             |
| ENSRNOG00000002879 | 2050.71516 | 1.65407566 | Psen2              |
| ENSRNOG00000008492 | 413.411297 | 1.65806081 | Cfap45             |
| ENSRNOG00000019549 | 10765.155  | 1.67384618 | Akap12             |
| ENSRNOG00000039668 | 6022.78839 | 1.69353433 | Col8a1             |
| ENSRNOG00000047734 | 928.819044 | 1.69535326 | Chst2              |
| ENSRNOG00000018500 | 1824.9915  | 1.69809152 | AABR07028615.<br>1 |

---

---

|                    |            |            |            |
|--------------------|------------|------------|------------|
| ENSRNOG00000013994 | 2341.97851 | 1.7184423  | Enpp1      |
| ENSRNOG00000054957 | 110.369558 | 1.76607114 | Sfrp4      |
| ENSRNOG00000000640 | 577.816068 | 1.77375277 | Egr2       |
| ENSRNOG00000011680 | 153.273047 | 1.77793838 | Il16       |
| ENSRNOG00000020546 | 193.339392 | 1.79161325 | Lipe       |
| ENSRNOG00000014424 | 855.121549 | 1.79648631 | RGD1563354 |
| ENSRNOG00000011648 | 3429.95127 | 1.82244671 | Aqp1       |
| ENSRNOG00000059765 | 167.241576 | 1.82773395 | Asic1      |
| ENSRNOG00000052880 | 192.930584 | 1.83196855 | Prph       |
| ENSRNOG00000051372 | 250.473345 | 1.83228402 | Mycn       |
| ENSRNOG00000018797 | 141.444749 | 1.83569531 | Myrip      |
| ENSRNOG00000010076 | 1381.34493 | 1.84685708 | Pkp1       |
| ENSRNOG00000002930 | 348.163218 | 1.86637808 | Ppl        |
| ENSRNOG00000016756 | 343.893688 | 1.86975172 | Ptgir      |
| ENSRNOG00000062101 | 427.84951  | 1.86997695 | Ace        |
| ENSRNOG00000003687 | 571.813837 | 1.87004484 | Rgs2       |
| ENSRNOG00000007415 | 260.766976 | 1.88045441 | Ptgs1      |
| ENSRNOG00000017136 | 229.901483 | 1.9032718  | Syt17      |
| ENSRNOG00000020552 | 215.972854 | 1.9090321  | Fosl1      |
| ENSRNOG00000005708 | 590.478687 | 1.98979179 | Mmp16      |
| ENSRNOG00000014363 | 565.599342 | 2.00268607 | Arhgef3    |
| ENSRNOG00000004972 | 542.556829 | 2.00471131 | Upp1       |
| ENSRNOG00000023720 | 132.636091 | 2.02997683 | Ntm        |
| ENSRNOG00000009734 | 2868.90475 | 2.03516737 | Akr1b8     |
| ENSRNOG00000006735 | 1811.99159 | 2.03558987 | Cdkn2b     |
| ENSRNOG00000005185 | 117.77919  | 2.10664072 | Nxph3      |
| ENSRNOG00000020579 | 599.232024 | 2.12798746 | Col7a1     |
| ENSRNOG00000007989 | 476.579395 | 2.13581063 | Chst1      |
| ENSRNOG00000019587 | 4268.04711 | 2.14636305 | Ptpn       |
| ENSRNOG00000011631 | 818.915667 | 2.15307362 | Fst        |
| ENSRNOG00000018094 | 184.131615 | 2.16005587 | Sv2c       |
| ENSRNOG00000043098 | 278.497577 | 2.18592361 | Mt2A       |
| ENSRNOG00000008187 | 459.702904 | 2.18857958 | Ubash3b    |
| ENSRNOG00000010960 | 992.776666 | 2.19143293 | Ankh       |
| ENSRNOG00000009005 | 767.198758 | 2.2128068  | Slco2a1    |
| ENSRNOG00000014061 | 124.090217 | 2.30216419 | Dusp5      |
| ENSRNOG00000027024 | 887.042686 | 2.34612743 | Rgs16      |
| ENSRNOG00000048967 | 263.985315 | 2.38365836 | LOC688459  |
| ENSRNOG00000020792 | 938.466377 | 2.3908686  | Etv4       |
| ENSRNOG00000049028 | 197.803054 | 2.43511392 | C5ar2      |
| ENSRNOG00000059837 | 160.912697 | 2.45954771 | Cdkn2a     |
| ENSRNOG00000010797 | 425.429535 | 2.48373796 | Esm1       |
| ENSRNOG00000004276 | 775.619862 | 2.50081192 | Itga3      |

---

---

|                    |            |            |                    |
|--------------------|------------|------------|--------------------|
| ENSRNOG00000002653 | 158.454426 | 2.50204245 | Kcnk2              |
| ENSRNOG00000024728 | 460.595426 | 2.59493045 | Arhgap22           |
| ENSRNOG00000016456 | 225.855468 | 2.59708814 | Il33               |
| ENSRNOG00000016156 | 739.638532 | 2.6028402  | Nptxr              |
| ENSRNOG00000000488 | 5127.6332  | 2.66620748 | Hmga1              |
| ENSRNOG00000004956 | 318.236689 | 2.74516414 | Jade2              |
| ENSRNOG00000011300 | 188.825873 | 2.78618468 | AABR07031193.<br>1 |
| ENSRNOG00000001158 | 842.982263 | 2.79672882 | Abcg1              |
| ENSRNOG00000023896 | 3437.60794 | 2.90114288 | Dusp6              |
| ENSRNOG00000042460 | 261.973209 | 2.93631116 | Hmga2              |
| ENSRNOG00000016267 | 416.418593 | 3.15071897 | Chst15             |
| ENSRNOG00000017484 | 1219.75904 | 3.27375228 | Gja5               |
| ENSRNOG00000020918 | 7372.65047 | 3.31953222 | Ccnd1              |
| ENSRNOG00000053766 | 887.999851 | 3.53289592 | Ramp3              |
| ENSRNOG00000019718 | 136.423388 | 3.6316174  | Galnt15            |
| ENSRNOG00000002202 | 111.903234 | 3.8874247  | Sowahb             |
| ENSRNOG00000008057 | 122.630153 | 4.14865608 | Krt7               |
| ENSRNOG00000012098 | 760.972584 | 4.83274774 | Adcyap1r1          |
| ENSRNOG00000003741 | 308.586835 | 5.74181837 | Nptx1              |

---
